# Supplementary material for: Brief communication: Improving lake ice modeling in ORCHIDEE-FLake model using MODIS albedo data
Source: Copernicus journal article supplement (doi:10.5194/egusphere-2024-2907), 2024-12-10
Supplement: Supplementary file 1 [file egusphere-2024-2907-supplement.pdf]

Supporting Information for

## **Improving lake ice modeling in ORCHIDEE-FLake model using MODIS albedo data**

**Z. Titus<sup>1,2</sup>, A. Cuynet<sup>1</sup>, E. Salmon<sup>1</sup> and C. Ottlé<sup>1</sup>,**

<sup>1</sup>Laboratoire des Sciences du Climat et de l'Environnement, IPSL, CEA-CNRS-Université Paris-Saclay, Orme des Merisiers, Gif-sur-Yvette, 91190, France

<sup>2</sup>Laboratoire de Météorologie Dynamique, IPSL, Sorbonne Université, Institut Polytechnique de Paris, ENS, Palaiseau, 91120, France.

### **Contents of this file**

Tables S1 to S3

Captions for Tables S1 to S3

### **Introduction**

These tables provide supplementary information for our paper that is presented in the main text. Table S1 summarizes the calibrated values of the albedo parameters for water, snow and ice in comparison to prior values. Table S2 presents the RMSEs (modeled vs observed albedos), obtained with the new parameterizations in comparison with the prior model. Table S3 presents the median values of the time errors (simulated vs observed) for the simulation of the ice-on, ice-off and duration of the lake ice cover.

**Table S1.** Lake surface albedo parameters used in ORCHIDEE. Prior values proposed in Bernus and Ottlé, 2022 and new calibrated values (this work) are given for free water, snow and ice cover.

| Albedo       | Water | Snow |      | Ice  |     |
|--------------|-------|------|------|------|-----|
|              |       | Min  | Max  | Min  | Max |
| <b>Prior</b> | 0.07  | 0.77 | 0.87 | 0.3  | 0.5 |
| <b>Post</b>  | 0.07  | 0.50 | 0.87 | 0.15 | 0.5 |

**Table S2.** RMSEs and improvement factors between MODIS albedo and simulations. Prior refers to the standard model, Post to the albedo revised one.

| Lake                      | Erie | Huron | Michigan | Ontario | Superior |
|---------------------------|------|-------|----------|---------|----------|
| <b>Prior Albedo RMSE</b>  | 0.38 | 0.32  | 0.30     | 0.22    | 0.54     |
| <b>Post Albedo RMSE</b>   | 0.17 | 0.08  | 0.05     | 0.06    | 0.16     |
| <b>Improvement factor</b> | 0.55 | 0.75  | 0.83     | 0.73    | 0.70     |

**Table S3.** Median values of the time errors (in days) simulated by ORCHIDEE-FLake for each lake category (shallow, medium and deep) in the simulation of ice-on, ice-off and duration of the lake ice cover. Prior refers to the standard model, Post to the albedo revised one.

| Lake category  | Ice-on errors<br>(in days) |      | Ice-off errors<br>(in days) |      | Duration errors<br>(in days) |      |
|----------------|----------------------------|------|-----------------------------|------|------------------------------|------|
|                | Prior                      | Post | Prior                       | Post | Prior                        | Post |
| <b>Shallow</b> | -7.0                       | -6.0 | +14.9                       | +5.5 | +21.2                        | +8.8 |
| <b>Medium</b>  | -6.6                       | -1.3 | +14.2                       | +1.8 | +20.9                        | +3   |
| <b>Deep</b>    | +4.8                       | +3.5 | +25.7                       | +7.7 | +23.7                        | +6.9 |
