# Supplementary material for: Brief communication: Improving lake ice modeling in ORCHIDEE-FLake model using MODIS albedo data
Source: Copernicus journal article supplement (doi:10.5194/egusphere-2024-2907), 2024-12-10
Supplement: Supplementary file [file egusphere-2024-2907-AC3-supplement.pdf]

# Brief communication: Improving lake ice modeling in ORCHIDEE-FLake model using MODIS albedo data

Zacharie Titus<sup>1,2</sup>, Amélie Cuynet<sup>1</sup>, Elodie Salmon<sup>1</sup> and Catherine Ottlé<sup>1</sup>

<sup>1</sup>Laboratoire des Sciences du Climat et de l'Environnement, IPSL, CEA-CNRS-Université Paris-Saclay, Orme des Merisiers, Gif-sur-Yvette, 91190, France

<sup>2</sup>Laboratoire de Météorologie Dynamique, IPSL, Sorbonne Université, Institut Polytechnique de Paris, ENS, Palaiseau, 91120, France.

Correspondence to: Catherine Ottlé (catherine.ottle@lscce.ipsl.fr)

**Abstract.** The Flake lake model embedded in the ORCHIDEE land surface model was recently updated to better represent winter ice cover. MODIS albedo data and the Great Lakes Ice Cover fraction dataset over the Laurentian Great Lakes were used to calibrate and validate a new parameterization of the lake albedo accounting for a partial ice cover fraction. The ~~results show large improvements in developments were validated regarding~~ the ~~simulation of the ice~~ phenology of ~~the ice cover of~~ 200 lakes of various sizes reported in the Global Lake and River Phenology database. ~~The Results are in better~~ agreement with the observations ~~is improved~~ for all lake size categories, with the largest and deepest lakes showing ~~larger more significant~~ error reductions on the duration of the ice cover period up to 18 days. This study highlights the importance of considering partial ice cover to correctly model lake albedo in cold regions and thus to simulate realistic mass and energy exchanges at the land-atmosphere interface.

## 1 Introduction

The key role of lakes on the atmosphere-surface water and energy exchanges at local, regional, and global scales ~~has been demonstrated in various works (Tranvik et al., 2009, (Williamson et al., 2009, Woolway et al., 2020, Huang et al., 2023, to cite but a few). Therefore,)~~ explains the attention given to improving their representation in climate and weather prediction models ~~becomes a necessity to improve numerical predictions~~. Lakes present specific physical properties compared to their surroundings (lower albedo and surface roughness, larger heat capacity and thermal conductance) that impact the energy exchanges with the atmosphere. Lakes are also a significant source of water, carbon and methane whose impact on climate is still not precisely quantified (Johnson et al., 2022, Lauerwald et al., 2023). Moreover, in cold regions, lakes can freeze and store snow, with large impacts on the seasonal evolution of water and energy surface fluxes, but also on carbon exchanges, as reported by several authors, because of the accumulation of gases under the ice cover that can be released abruptly when the ice melts (Mammarella et al., 2015, Denfeld, et al., 2018). ~~The-Therefore, the~~ representation of freezing processes is ~~is, therefore,~~ key for modeling ~~the dynamics of~~ the atmosphere thermodynamics and greenhouse gases (carbon and methane) budgets, especially in the present context of climate warming. Indeed, long time series of observations have highlighted the impacts of the combined effects of air temperature increase, ~~but also of and~~ volume variations on lake temperature and thermal regime, ~~as well as~~ on the loss of winter ice cover (O'Reilly et al., 2015, Woolway et al., 2020, Huang et al., 2023, ~~Sharma et al., 2015~~). To better understand these connected processes, and better predict future trends, climate models need to develop lake modules able to correctly represent water and energy budgets as well as and the carbon cycle. Such developments have been ongoing

36 in the climate modeling community for several years, with major works demonstrating the benefits of representing lakes at the  
37 global scale in Numerical Weather Prediction and climate models (e.g., [Dutra et al., 2010](#), [Balsamo et al., 2012](#), [Le Moigne et al., 2016](#)).

39 In these large-scale models, the representation of lakes is generally done simplistically, based on 1D column models which do  
40 not represent the spatial variability of the surface exchanges ~~linked to the varying bathymetry~~. The same applies to the freezing  
41 processes and the fact that ice cover is considered uniform laterally. However, its formation can take several days /weeks and  
42 may never be completed for some large and deep lakes. Moreover, because of the [spatial variability of the lake properties](#)  
43 ~~(bathymetry and the sometimes large spatial variations in lake depth, for example)~~, the mass and energy transfers can present  
44 very heterogeneous features, so the ice cover and the resulting impacts on surface fluxes, as shown [by Lang et al. \(2018\)](#) for  
45 methane emissions ~~on the from~~ Tibetan lakes ~~by Lang et al. 2018~~.

46 The modeling of ice conditions is an ~~important~~ [essential](#) challenge in such [large-scale](#) models for several reasons ~~such as,~~  
47 [including the fact](#) that the processes involved are strongly ~~nonlinear, non-linear~~ because free water and ice show very different  
48 characteristics [in terms of bio-geo-physical properties](#), and ~~also~~ exhibit high spatial and temporal variability. Scale issues must,  
49 therefore, be parameterized to account for these variabilities. Lake temperature ~~is the result of results from~~ the energy budget,  
50 which ~~is~~ strongly ~~dependent~~ [depends](#) on the surface albedo ~~which determines, determining~~ the amount of solar energy absorbed  
51 at the surface. ~~When~~ [In cold conditions, when](#) the ~~air~~ surface temperature ~~falls~~ [drops](#) below 0°C, ~~the ice formation may begin~~  
52 [driven by many variables, including atmospheric conditions](#), lake ~~begins to freeze, but it may take several days before it is~~  
53 ~~completely frozen depending on its size and depth. In this process, lake~~ bathymetry ~~and weather conditions. Moreover,~~  
54 ~~large~~ [plays a key role in determining the lake heat capacity and consequently the speed of the ice formation, explaining why](#)  
55 lakes ~~may not freeze from their perimeter to their center and why shallow lakes can~~ freeze ~~over completely quicker than deeper~~  
56 [ones in the same atmospheric conditions](#). In consequence, if one wants to correctly represent the ice cover phenology in 1D  
57 models, an ice cover fraction has to be introduced and used to compute a more realistic [dynamics of the lake](#) surface albedo.

58 Several works have shown the impact of the incorrect representation of lake freezing processes in land surface models (LSMs),  
59 e.g., [Pietikäinen et al., 2018](#); [Choulga et al., 2019](#); [Garnaud et al., 2022](#). Based on the ~~Flake~~ [FLake](#) lake model, [Bernus and](#)  
60 [Ottlé \(2022\)](#) also identified shortcomings in ~~the modeling of~~ lake ice phenology in the ORCHIDEE LSM. Although the model  
61 evaluation against lake water surface temperatures showed satisfactory results with an RMSE around 2.7 °C at the global scale,  
62 systematic errors in the prediction of ice phenology were highlighted, with too early ice onset and late offset, leading to an  
63 overestimation of the ice cover period up to 30 days on average ([Bernus and Ottlé, 2022](#)). In a previous study, [Bernus et al.](#)  
64 [\(2020\)](#) studied the surface temperature sensitivity to model parameters and highlighted the key role of snow and ice radiation  
65 coefficients (light extinction and albedo) on ice phenology.

66 Among these two essential radiative variables, surface albedo is the one that has been mapped at the global scale with remote  
67 sensing for several years. Various satellite products provide daily albedo time series at a [scale of a few hundred meters](#) ~~scale~~  
68 over the last thirty years, which can be used to evaluate and calibrate LSMs. In ORCHIDEE, such products are commonly  
69 used to calibrate model parameterizations ~~(Bastrikov et al., personal communication)~~. ~~Recently~~. [For example](#), [Raoult et al.](#)  
70 [\(2023\)](#) calibrated the ORCHIDEE snow model over the Greenland ice sheet using MODIS albedo data and showed  
71 improvements in the model fit to the observations and the impacts on the simulated snow states, especially the sublimation  
72 processes.

73 In this paper, we present recent work performed in the ORCHIDEE-FLake model to better represent lake freezing through the  
74 account of a partial ice cover and the revision of the lake albedo parameterization. The developments are based on the MODIS

albedo product ~~which was used both~~ to model ice cover fraction and to calibrate the albedo parameters. The modeled lake ice phenology is evaluated against *in situ* data. Results and following steps for further parameter optimization are finally discussed.

## 2 Data, model and methods

### 2.1 Datasets used

#### 2.1.1 HydroLAKES database

The HydroLAKES database (Messenger et al., 2016), identifies all lakes larger than 0.1 km<sup>2</sup> at the global scale and provides estimates of their mean depth (Messenger et al., 2016). ~~It based on a geostatistical model linking lake bathymetry to surrounding terrain topography.~~ HydroLAKES was used by Bernus and Ottlé (2022) to generate the lake tiles in the ORCHIDEE grid by clustering the lake area according to their mean depth. In this work, HydroLAKES has also been used to mask the studied lakes in the surface albedo time series and to extract the data for ~~the assessment of~~ assessing the ice cover fraction ~~and~~ for analyzing its seasonal variations. Data can be downloaded at <https://hydrosheeds.org/page/hydrolakes> (last access: March 2024).

#### 2.1.2 MODIS data products

We used the MCD43A3 albedo product (Schaaf and Wang (2021), to assess the seasonal evolution of the lake ice cover and to calibrate the model albedo parameters. The data are provided at a daily time step with a 500 m resolution. The bi-hemispherical and directional hemispherical reflectances are given for multiple narrow bands and ~~also for~~ three broadbands (visible, near-infrared, and ~~fullentire~~ solar spectrum corresponding to the surface albedo). The effective surface albedo is a combination of the shortwave bi-hemispherical reflectance, also called White Sky Albedo (WSA), and the shortwave directional hemispherical reflectance (Black Sky Albedo, BSA) and depends on the cloud coverage. In the absence of such information, and given that our model does not separate direct and diffuse radiation, we assumed that the average of the retrieved WSA and BSA is a better approximation of the surface albedo as ~~it is~~ modeled in ORCHIDEE. Data are available at <https://lpdaac.usgs.gov/products/mcd43a3v006/> (last access: December 2024).

~~Crossing Overlying~~ the albedo raster images with the HydroLAKES polygons allowed us to extract the lake's surface albedo and ~~spatial variability. To avoid radiance contamination by the lakeshore pixels, which are generally covered by vegetation and have larger albedo values compared to water, we used a spectral vegetation index to mask such mixed pixels. The NDVI MODIS product (MOD13A1, Didan, 2015) with the same spatial and temporal resolutions as the MODIS albedo product, was then used for this purpose. Data are available at https://lpdaac.usgs.gov/products/mod13a1v061/ (last access: December 2024).~~ its spatial variability.

#### 2.1.3 Great Lakes Ice Cover (GLIC) database

The GLIC database provides daily gridded ice cover data at 1.8 km resolution over the Great Lakes from 1973 to ~~the~~ present. The dataset fully described by Yang et al. (2020), ~~is~~ is based on the standardization of the previously existing GLIC ~~multisource~~ dataset developed by the Canadian Ice Service and the US National Ice Center. Using interpolation techniques (nearest neighbor for space and linear for time), ~~combined with new satellite and meteorological information,~~ Yang et al. (2020)

created coherent data available at the same standardized spatial and temporal resolutions throughout the entire period. The daily data over the ~~5-lakes~~five Great Lakes (Erie, Huron, Michigan, Ontario, and Superior) can be downloaded at: <https://www.glerl.noaa.gov/data/ice/>. They were used as a reference to calibrate our albedo-based ice cover detection method for ~~the period~~ 2008 – 2018.

#### 2.1.4. Lake ice phenology

We used the Global Lake and River Phenology (GLRP) database to evaluate the modeled lake freezing processes (Benson et al., 2000). This dataset provides the onset, ~~/offset dates,~~ and duration of observed freezing periods for 857 lakes ~~located~~ worldwide. Data are available for ~~some most~~ lakes back to ~~1850~~1845 and even earlier for a few water bodies, and up to 2020 ~~and for the most recent data. The dataset~~ can be downloaded at: <https://doi.org/10.7265/N5W66HP8> (last access: March 2024). It should be noted that the reported information is not homogeneous; since, for some lakes, the definition of the ice-on date is the date when the lake is ~~completely~~entirely ice-covered, while for the other lakes, it is the date when the lake starts to freeze. ~~Moreover, time series are not continuous and may contain long periods without data.~~ We also used the SYKE database ~~from the Finnish Environment Institute~~, which reports *in situ* ice formation and disappearance for 27 lakes located in Finland, as reported by Choulga et al. ~~(2019)~~(2019). The dataset is available at: <https://www.syke.fi/en/environmental-data/downloadable-spatial-datasets> (last access: March 2024).

#### 2.1.5. ERA5 meteorological reanalysis

The ERA5 reanalysis dataset was used to simulate the lake thermal processes with ORCHIDEE. This atmospheric forcing is available globally at an hourly time scale and with a 31 km resolution from 1940 onwards (~~Hersbach~~Soci et al., ~~2020~~2024). It was interpolated at a half-hourly time step and a 0.25° resolution, following the methodology presented by Wei et al., 2014. We used the solar and atmospheric downward radiations, the air temperature and humidity, wind speed, precipitation, and atmospheric pressure at the surface to force the model. Data are available at: ~~<https://cds.climate.copernicus.eu/cdsapp#!/dataset/reanalysis-era5-complete?tab=overview>, last access: March 2024~~<https://cds.climate.copernicus.eu/cdsapp#!/dataset/reanalysis-era5-complete?tab=overview> (last access: March 2024).

### 2.2 ORCHIDEE-FLake model

#### 2.2.1 Current status

ORCHIDEE is the continental component of the Institut Pierre Simon Laplace (IPSL) Earth System Model, which provides the boundary conditions and the energy, water, and carbon fluxes to the atmospheric general circulation model LMDZ (Cheruy et al., 2020). ORCHIDEE can be run coupled with LMDZ or ~~with~~ prescribed atmospheric conditions delivered by *in situ* measurements or atmospheric forcing datasets. Land surface characteristics are provided by various datasets, such as land cover maps, which can be updated yearly. In ORCHIDEE, vegetation is described ~~in terms of~~with fifteen Plant Functional Types (PFTs) whose fractions ~~need to~~must be prescribed for each grid point. The model was recently updated with a lake module based on the FLake 1-D lake model (Mironov, 2008), fully described in Bernus and Ottlé, (2022). In the present version, lakes are considered as distinct tiles within the grid, on which a separate energy budget is solved, independently from the rest of the vegetated grid (no lateral transfers). The lake cover fraction is static and is derived from the HydroLAKES database (Messenger et al., 2016), which was used to cluster three categories of lakes according to their average depth.

~~Shallow~~ Lake cover fractions for shallow (depth less than 5 meters), deep (depth over 25 meters), and ~~intermediate~~ medium (depth ranging between 5 m and 25 m) lake ~~cover fractions types~~ have been derived to generate yearly land cover maps, including lake tiles fractions, ~~at various grid resolutions, characterized by their surface area and their effective depth and wind fetch (distance wind blows without obstruction).~~ These three effective lakes were obtained by aggregating the areas of all the lakes falling in each lake category and calculating the median value of their respective depth and fetch approached by the lake surface extent (see Bernus and Ottlé, 2022 for more information). The bulk energy budgets resolved in FLake allow us to predict the evolution of the vertical temperature structure within a mixed layer and ~~an underlying~~ thermocline ~~underneath~~, given several input parameters, namely the lake mean depth, the light extinction coefficient, the water, snow, and ice albedos and the ~~fetch (distance wind blows without obstruction).~~ wind fetch. In cold conditions, the surface layer can freeze and an ice layer may develop and intercept snow. Because of the 1-D model structure, the whole lake surface freezes when the surface lake temperature falls below 0°C, and the ice thaws above this temperature threshold, regardless of the ~~lake's size-of the lake~~. Water, snow, and ice layer thicknesses and temperatures are prognostic variables calculated at each time step (30 ~~min~~ in ORCHIDEE).

### 2.2.2 Ice cover fraction

The parameterization proposed by Garnaud et al. (2022) was implemented in ORCHIDEE to represent the lake ice cover, improve the surface albedo, and reduce the cold temperature biases. This model was successfully introduced in the Canadian Small Lake Model (CSLM) and showed improvements in the timing of ice-on/off periods especially for the Great Lakes. ~~Similarly~~ Similar to other parameterizations, such as the one proposed by Choulga et al. (2019) and used in the Integrating Forecasting System of the European Centre for Medium-Range Weather Forecasts (ECMWF), the ice cover fraction is derived from the calculated ice thickness and equals unity above a certain threshold. In Choulga et al. (2022), this threshold is set to 10 cm, which means that above this threshold, the lake tile is completely frozen, and below it, the cover fraction decreases linearly to 0% until the lake is completely thawed. In Garnaud et al. (2022), the threshold is set to a critical value dependent on the wind fetch, ~~to represent the fact~~ representing that ice is more likely to break under the action of wind stress until it grows to a critical thickness. This critical ice thickness value  $H_{crit}$  may be written:

$$H_{crit} = \frac{\tau_a}{P^*} \times L \quad (1)$$

Where  $\tau_a$  is the scale of the surface wind stress (set to 0.15 Pa),  $P^*$  is the compressive strength of ice (set to 27.5 kPa) and  $L$  is the lake fetch (in meters). The ice cover fraction of the lake tile,  $Icefrac$ , is then derived from the modeled ice thickness  $H_{ice}$  using Eq. 2:

$$Icefrac = \frac{H_{ice}}{H_{crit}} \quad (2)$$

We have implemented this parameterization in ORCHIDEE-FLake as ~~an input to the calculation of~~ for calculating the lake surface albedo. For each lake tile, the fetch is static and prescribed to the mean of the fetch of all the lakes falling in the tile. It is estimated at the lake level from the surface extent by assuming a circular shape and taking the diameter of this circle. -Given that we did not consider lakes smaller than 0.1 km<sup>2</sup> due to the limitations of the HydroLAKES database, it means that the fetch values range between a few meters and a few hundred kilometers, leading to critical thicknesses ranging between 2 mm for the smallest lakes to 1.1 m for the larger ones.

190 In ORCHIDEE-FLake, the lake surface albedo is calculated according to the surface temperature. For free water, the albedo  
 191 is set to a value of 0.07 which is the standard value used in FLake. In the presence of ice, possibly covered by snow, the lake  
 192 surface albedo ( $alb$ ) depends on the temperature as suggested by Mironov et al., 2012 and varies between two limits  
 193 corresponding to wet and dry snow (in presence of snow), and to blue and white ice (~~if any without~~ snow), based on the same  
 194 equation (Eq. 3):

$$195 \quad alb(T_{surf}) = albedo_{max} + (albedo_{min} - albedo_{max}) \exp\left(\frac{-C_{alb} \times (273.15 - T_{surf})}{273.15}\right) \quad (3)$$

196 where  $albedo_{min}$  and  $albedo_{max}$  are respectively the minima and maxima values for ice or snow,  $T_{surf}$  is the snow or ice  
 197 surface temperature in Kelvin, which is always lower than the water freezing point temperature, and  $C_{alb}$  is a fitted coefficient  
 198 equal to 95.6 (Mironov et al., 2012). In FLake, the minimum and maximum albedos are equal to 0.1 and 0.6, respectively, for  
 199 both snow and ice. They were revised by Bernus and Ottlé (2022) following Semmler et al. (2012) and Pietikäinen et al. (2018),  
 200 and set to 0.3-0.5 and 0.77-0.87 for ice and snow, respectively (see Table S1 in Supporting Information). In this work, to  
 201 account for partial ice coverage, we implemented a supplementary equation, linking linearly the lake albedo to the ice  
 202 fraction and accounting for the presence of snow, if any. The lake tile surface albedo  $alb_{tile}$  is now given by Eq. 4:

$$203 \quad alb_{tile}(T_{surf}) = Icefrac_{tile} \times alb(T_{surf}) + (1 - Icefrac_{tile}) \times alb_{water} \quad (4)$$

204 where  $alb_{water}$  is the free water albedo,  $alb(T_{surf})$  is the snow albedo in snowy conditions and the ice one otherwise, both  
 205 derived from Eq. 3 and dependent on the surface temperature of the lake tile.

## 207 2.3 Methods

### 208 2.3.1 MODIS Albedo processing on Laurentian Great Lakes

209 The MCD43A3 albedo product was used to analyze the winter seasonal variations of several lakes for which *in*  
 210 *situ* ice cover observations were available. In particular, the Laurentian Great Lakes, well documented in the GLIC database,  
 211 and the Finnish lakes, included in the SYKE dataset, were studied. We designed a method to estimate ice cover fractions from  
 212 the albedo observations, ~~these fractions were further and~~ used them to evaluate model parameterizations. Moreover, we also  
 213 used the albedo data ~~were also used~~ to calibrate the free water, snow, and ice albedo parameters.

#### 215 2.3.1. Ice cover estimation

216 The comparison of the lake averaged albedo time series over the 2008-2018 period, with the *in situ* ice cover fractions reported  
 217 in GLIC, allowed us to determine a lower threshold of the albedo above which, we could assume that the lake started to freeze  
 218 durably. This threshold appeared to be the same for all five Great Lakes and was found to be 0.15. The maximum value was  
 219 set to 0.9 since this value was reached for all the lakes that were completely covered at least once during the studied period.  
 220 Assuming a linear relationship between these two extremes, we derived time series of ice cover fractions for each of the Great  
 221 Lakes. The comparison of these estimates with *in situ* measurements over the 11 years studied shows a very good agreement,  
 222 with RMSE ranging from 4% for Lake Ontario to 9% for Lake Erié. The latter showed the largest errors because it is the  
 223 smallest and shallowest of the five lakes and has the largest ice fractions.



We also checked if our methodology could be applied to smaller lakes and tested it on some of the Finnish lakes present in the SYKE database for which Choulga et al. (2019) reported the dates when the lake was completely frozen or completely thawed. Therefore, we compared these specific dates estimated from the MODIS albedo time series to those observed in the GLCSYKE database and found that over the period 2010 - 2015, our method has an average error of 2 days for Lake Nilakka and 5 days for Lake Nasijarvi, the only two lakes we could formally identify in the HydroLAKES database, which were resolved in our ORCHIDEE lake cover map.

### **2.3.2. Model parameters calibration**

The MODIS albedo time series combined with a literature survey were also used to revise the lake albedo model parameters. For free water, even if some of the larger studied lakes showed lower minimum values around 0.02, most of the lakes present an average value of 0.07, which is the value used as a standard in FLake. Lower The lower values, such as the ones observed on the Great Lakes (as low as 0.0201), could be the result of the larger surface roughness observed over such large lakes, which could increase the multiple reflections and reduce the overall surface reflectance, reflectances, thus the total albedo. In frozen conditions, the observations confirmed that snow-covered ice could reach values up to 0.9. Therefore, the maximum values for ice and snow albedos were kept to the prior values set in Bernus and Ottlé (2022), i.e., 0.87 and 0.5 for snow and ice, respectively. Minimum values being more difficult challenging to observe because of the cumulative effect of ice and snow aging and partial coverage, we rely on *in situ* measurements such as the ones reported by Svacina et al. (2014), showing snow minimum values close to 0.5, or the ones reported by Lang et al. (2018), showing minimum blue ice albedos around 0.15. The prior and posterior values of the albedo model parameters are summarized in Table S1 in Supporting Information.

### **2.3.2. Model experiments**

The evaluation of the revised albedo parameterization was done at a global scale. Two ORCHIDEE simulations were performed: a reference one using the standard model (called “Prior”) and another one based on the present developments (called “Post”), including lake fraction and calibrated albedo parameters. The simulations were performed on the 1979 – 2019 period and the results were analyzed over the period 2008 – 2018 to ensure a 30-year spinup/warmup period necessary to avoid initialization errors. The For both simulations, the same atmospheric forcing was provided by conditions were prescribed based on the ERA5 reanalysis (section 2.1.5) at the half-hourly model time step and 0.25° spatial resolution. The lake surface temperatures simulated over each lake tile present in the model grid cell were downscaled to extract the lake surface temperatures and ice thicknesses simulated over each lake reported in the GLRP and the SYKE databases. As a result of missing data over our study period, (2008 – 2018), only 200 lakes among the 857 ones reported in the GLRP dataset were used for the model evaluation. These lakes are mainly located in the northeastern part of Canada and the US, and in Scandinavia (Figure S3 in Supporting Information), covering a large diversity of boreal and arctic climates. The model performances in the representation of ice cover phenology, surface albedo and surface temperature are discussed in terms of root mean square errors (RMSE) and improvement factor (or error reduction, equal to  $1 - \frac{RMSE_{post}}{RMSE_{prior}}$ ), with larger values corresponding to larger improvement  $(1 - \frac{RMSE_{post}}{RMSE_{prior}})$ , with larger values corresponding to larger improvement. In this comparison, we assumed that the ice-on and ice-off dates correspond to when the lake is completely frozen and ice-free, respectively. Given that deep lakes present partial coverage most of the time and that the observations may not be representative of the whole lake, we decided, after various tests, to diagnose the ice phenology dates with the simulated surface temperature as was done in Bernus and Ottlé, 2022. Therefore, for the deep lake category, the ice-on period is supposed to start when the modeled surface temperature falls below 0°C.

### 265 3. Results

#### 266 3.1 Lake albedo evaluation on Great Lakes

267 Figure 1 presents the lake surface albedo simulated by ORCHIDEE over the five Great Lakes for the “prior” and “post”  
 268 simulations together with satellite-derived albedo observations (MODIS MCD43A3 data). Here, we present the observed and  
 269 simulated daily values ~~averaged~~ over the 2008 – 2018 period ~~to calculate (the~~ mean averaged seasonal cycles ~~– over the same~~  
 270 period are given in Figure S1). The prior and post RMSE calculated over the whole freezing period, ~~as well as and~~ the  
 271 improvement factors, are given in Table S2 (Supporting Information).

272 The results ~~clearly show~~highlight the improvements brought by ~~the consideration of~~considering partial ice cover and the  
 273 calibration of the minimum values of ice and snow albedos. The prior simulations presented a systematic overestimation of  
 274 the albedo resulting from the overestimation of the ice cover (equal to 1 during most of the winter season for the five lakes and  
 275 all the years except the warmer ones i.e., 2012, 2016 and 2017). The RMSEs which were ranging between 0.22 (for Lake  
 276 Ontario) and 0.54 (for Lake Superior) are considerably reduced within the range of 0.05 (for Lake Michigan) to 0.17 (for Lake  
 277 Erie), with improvement factors larger than 70% (see Table S2, Supporting Information). The error reduction is slightly higher  
 278 for Lake Michigan, equal to 0.83, and lower for Lake Erie, equal to 0.55. The slightly lower improvement observed for the  
 279 ~~smallest~~shallowest lake studied is probably linked to the fact that Lake Erie, contrary to the others, can freeze entirely during  
 280 the colder winters, ~~then thus~~ reducing the benefit of considering the partial ice cover. ~~Even if the~~The albedo time series ~~do not~~  
 281 ~~reveal systematic biases, they show that the albedo can be largely underestimated~~plotted over the whole studied period (Figure  
 282 1) highlight the overall reduction of the errors with the new parameterizations, especially for some years. This is particularly  
 283 ~~the case for the largest and deepest lakes like Lake Erie in 2008~~Superior, Ontario and Michigan. The errors shown in Figure  
 284 S2 reveal remaining errors during the warmest winters, like in 2016 and 2017, with an overestimation of the ice cover for all  
 285 categories of lakes and an underestimation during the coldest years (like in 2014 and 2015–or), especially for Lake the two  
 286 shallowest lakes (Erie and Huron in 2015 (not shown here). We have seen that for all these lakes, the spatial variability). It  
 287 should be noted that the standard deviation of the observations is very large for all these lakes, demonstrating a large spatial  
 288 variability of the ice coverage among the lakes. We can also see that the free water albedo is lower in the observations compared  
 289 to the modeled one (prescribed to 0.07), which leads to systematic positive biases in the albedo simulation. Finally, Table S3  
 290 demonstrates that the temporal variability of the modeled albedo is in better agreement with the observations of all five Great  
 291 Lakes. The standard deviation values which were always overestimated with the Prior model, have decreased. The more  
 292 realistic maximum and minimum albedo values and interquartile range of the distributions show that the ice conditions are  
 293 better simulated with the revised model.



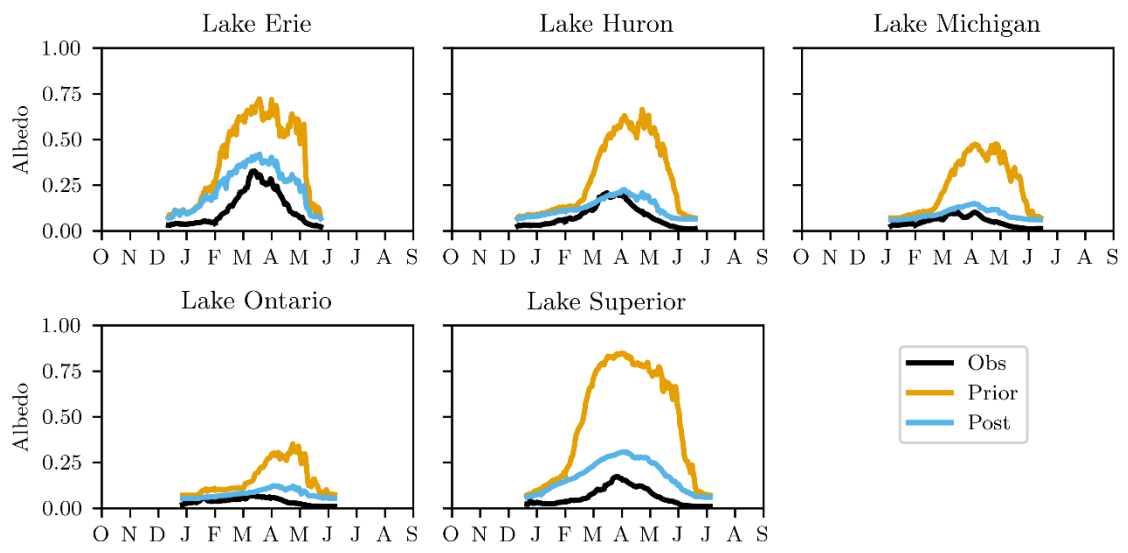

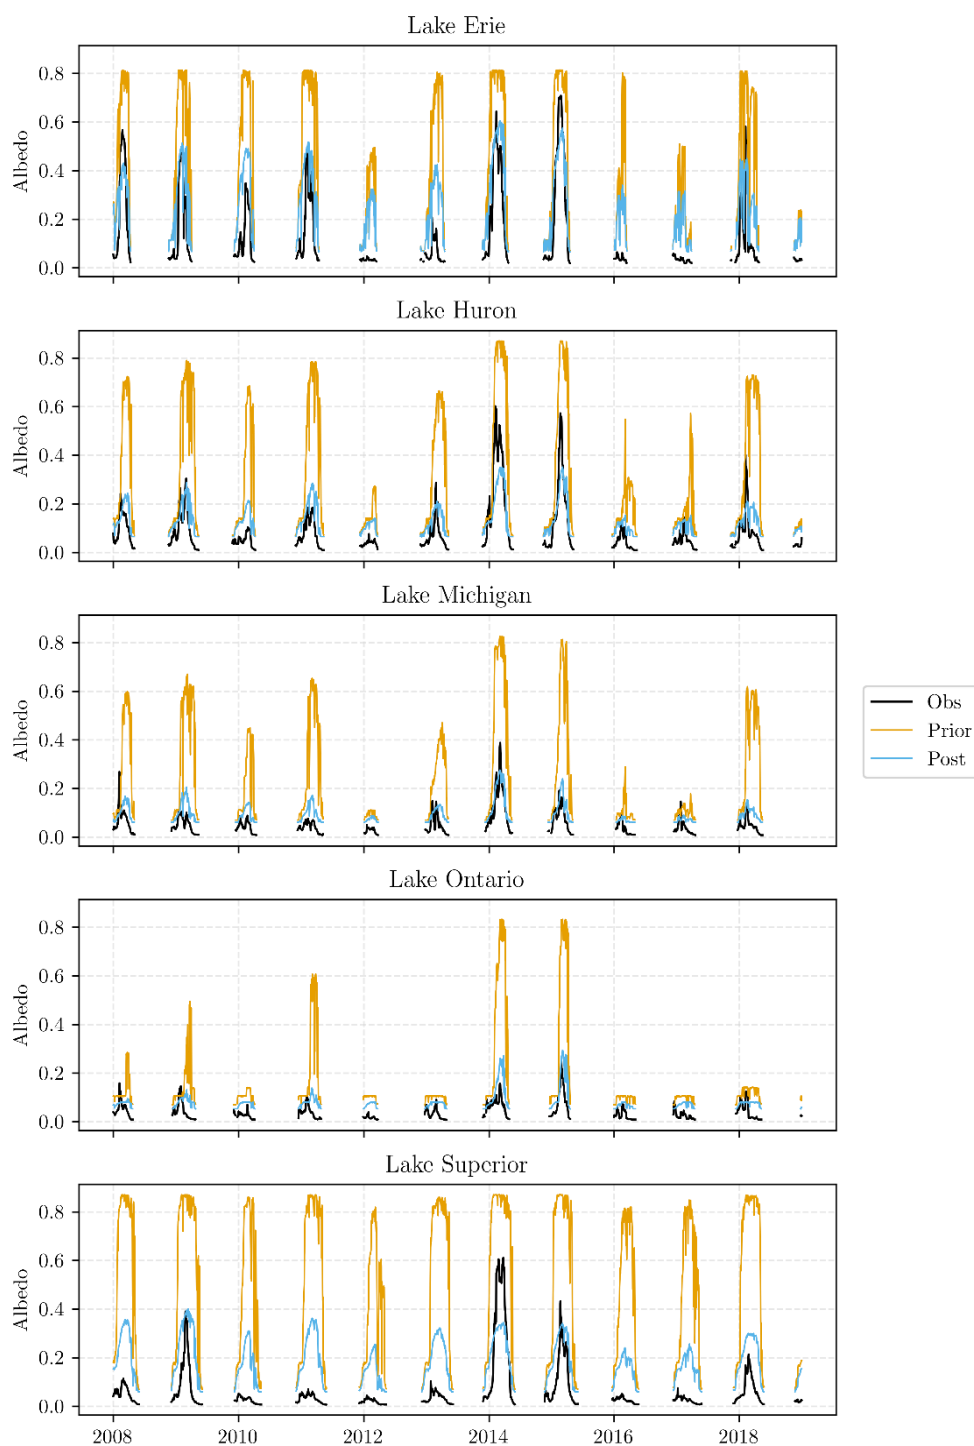

**Figure 1. Lake surface albedo calculated by ORCHIDEE over the 2008-2018 period and compared to MODIS albedo observations (Obs) for the five Great Lakes, at a daily time step. Prior refers to the standard model, and Post, to the albedo revised one.**

### 3.2 Evaluation of lake ice phenology

~~The~~We compared the key dates of the ice cover phenology predicted by ORCHIDEE ~~were compared to the~~ GLICGLRP observations. Figure 2 presents the errors obtained in the simulation of the ice-on, ice-off dates and duration of the ice cover period for the 200 observed lakes, clustered into 3the three depth classes ~~according to their mean depth. In agreement with the~~ observations reported in the GLIC database, the ice fraction was used to diagnose the dates when the lake was completely

305 frozen(shallow, medium and ice free. We assumed that the ice on and ice off dates correspond to the dates when the lake is  
 306 completely frozen and ice free, respectively. Given that deep lakes present partial coverage most of the time and that the  
 307 observations may not be representative of the whole lake, we decided, after various tests, to diagnose the ice phenology dates  
 308 with the simulated surface temperature as was done in Bernus and Ottlé, 2022. Therefore, the ice on period starts when the  
 309 surface temperature falls below 0°C. This approach is empirical and may not be appropriate for all lakes but it allows us to  
 310 get a first picture of the added value of the fractional ice cover parameterization.)).

311 Figure 2 clearly shows The results show how the account for partial freezing in the albedo model improved the timing of the  
 312 lake freezing, the start and the end of the period compared to the prior simulation, with an overall shift of the date of the start  
 313 of freezing of 1 day for the shallow lakes and 5 days for the medium and deep lakes. The ice-off also happened sooner by  
 314 about 9 days for the shallow lakes and by about 12 days for the medium lakes, which reduces the overestimation of the ice  
 315 cover duration by 12 days in the case of the shallow lakes and by nearly 18 days for the medium ones. The improvements are  
 316 even more significant for the deep lakes, especially for the date of the ice-off date, which has been brought forward by 18 days.  
 317 Results obtained for deep lakes show a larger variability of the model errors, especially for the start of freezing, which can be  
 318 explained both by the lower number of lakes sampled compared to shallow and medium lakes (10 compared to 139 shallow  
 319 lakes and 51 medium lakes), and by the larger uncertainty in the observations given the size of these lakes and the larger  
 320 spatial variability of the ice coverage. All the statistical results are summarized in Table S3S4 in Supporting Information.

321 Besides, the fact that the ice-off date appears to be more impacted by the new parameterization than the ice-on one is explained  
 322 by the larger sensitivity of the lake energy budget to the surface albedo during the spring months when the ice breaks, compared  
 323 to the early winter months, when the ice-on period starts for most of the lakes observed. This larger sensitivity is could be the  
 324 result of the different amounts of incoming radiation during these two periods, larger in spring compared to winter, as well as  
 325 the different dynamics of the freezing/melting processes. Our results also show that the deeper the lake, the larger the impact  
 326 of the ice fraction on the ice phenology. This was expected, since the length of the ice-on/ice-off periods increases with lake  
 327 size and is often positively correlated with depth, explaining the larger time gap between the two ways of parameterizing ice  
 328 cover fraction and related albedo (Prior vs. Post).

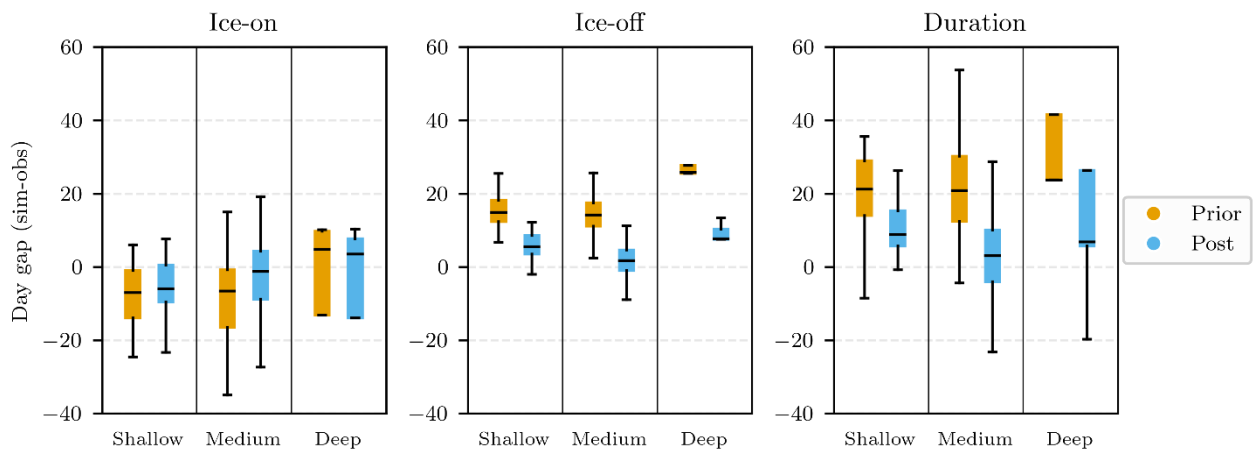

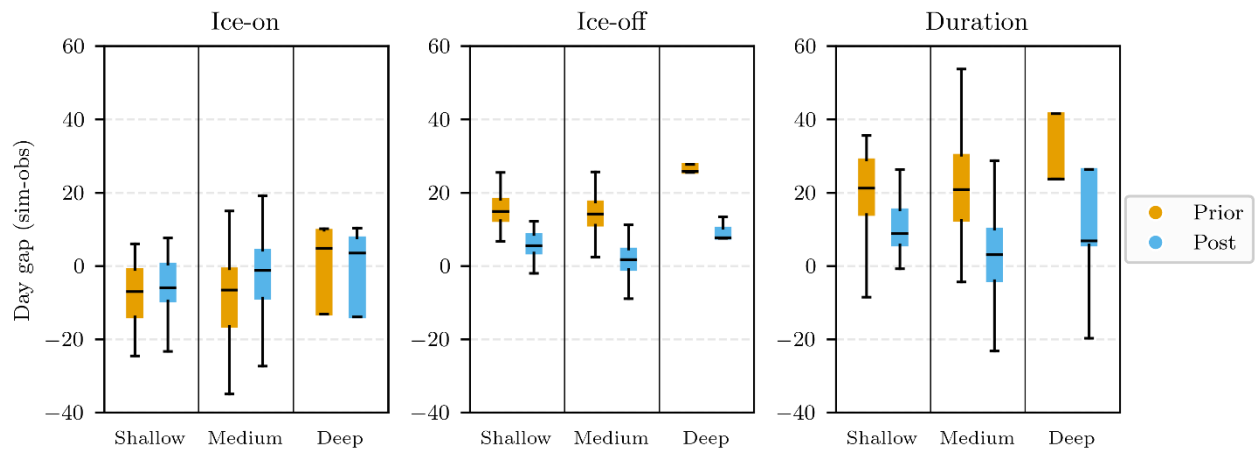

**Figure 2. Ice phenology modeled errors (in days) obtained on the 200 (139 shallow, 51 medium and 10 deep) lakes identified in the GLICLRP database. The boxplots show the median, first and third quartiles of the time delay (model - observations) as well as the minimum and maximum errors for the ice-on, ice-off and duration of the ice cover period. Prior refers to the standard model, Post to the albedo revised one, time errors are expressed in days.**

#### 4. Discussion and Conclusion

The representation of lake freezing processes is crucial in LSMs to correctly simulate the water, energy, and carbon exchanges with the atmosphere. This paper presents the contribution of MODIS albedo observations to calibrate a new representation of the freezing processes in the ORCHIDEE lake module. A methodology was set up to estimate water, snow and ice albedo range of variations, as well as and the ice cover fraction from the MODIS albedo time series. A new modeling of the ice fraction, based on Garnaud et al. (2022), was then implemented to better represent the lake surface albedo. Two simulations, with and without accounting for the lake ice fraction, were performed at the global scale to assess the contribution of the new developments on winter lake ice phenology. Our results clearly show the benefits of representing a partial ice coverage on the lake energy budget, for the three depth classes modeled in ORCHIDEE. The ice-on, ice-off and duration of the lake ice cover have been significantly improved, with discrepancies reduced to a few days for the timing of the ice-on and ice-off dates for all categories of lakes (shallow to deep lakes) and a more realistic duration period, with error reductions up to 18 days. However, the shallow lakes' ice-on date is still in advance by about 6 days for shallow lakes in advance, and the ice-off period is too late by about 5 days. This larger residual error for shallow lakes compared to medium ones could be explained by the fact that this category of lakes represents a large proportion of small lakes not explicitly resolved by ORCHIDEE and for which the lake tile mean properties could present larger differences from the real ones compared to the larger medium lakes. Failure to account for this sub-tile variability should have a greater impact on the shallow lake category, for which the depth distribution is the largest. For the deep lakes, we can note a large improvement in the prediction of the ice-off period but still an overestimation of the ice duration by about 7 days.

In this work, we were confronted with the lack of lake ice cover fraction data and, above all, with the lack of homogeneity of these data, with some data documenting the start of the ice period and others the date of complete coverage. In addition, for large lakes, the observations are local and not always representative of the entire lake being modeled. We This explains why we chose to diagnose the modeled ice phenology from the overall water temperature and not from the modeled ice fraction as it has been done for the two other lake categories. This approach is empirical and may not be appropriate for all lakes but it allowed us to get a first picture of the added value of the fractional ice cover parameterization. In any case, we demonstrated here that remote sensing albedo products are extremely useful for supplementing ice-cover measurements and for monitoring

the seasonality of lake ice cover, especially as the surface albedo is crucial for correctly modeling water, energy and carbon balances.

Despite the remaining biases ~~and the model limitations due to the crude modeling of the freezing processes in Flake and the effective parameters uncertainties~~, we think that these developments represent a step forward and pave the way to better simulate the energy and mass exchanges at the atmosphere interface with ORCHIDEE, and especially the water and GHG fluxes essential to study the impacts of climate and environmental changes on lakes. New observational datasets will help us ~~in the development to calibrate~~ and ~~evaluation of evaluate~~ future developments. In particular, the recent satellite-derived products providing global and consistent time series of water levels ~~and~~ extent, ice cover, albedo and surface temperature, such as the ESA – CCI – Lakes project (~~(~~<https://climate.esa.int/en/projects/lakes/>~~)~~), will be essential for our forthcoming works.

## Acknowledgments

This work was partially supported by the French National Space Agency (Centre National d'Etudes Spatiales) through the TOSCA-SWOT program, which funded the Master internship of Z. Titus. The European Horizon project, HORIZON-CL5-2021-D1-01, GreenFeedback (grant agreement 101056921) is also acknowledged for ~~funding the financing of~~ A. Cuynet and E. Salmon. The authors would like to thank A. Bernus for ~~transferring the transfer of the~~ model and data processing codes at the start of this work.

**Author contributions:** CO conceived and supervised the study. ZT implemented the new parameterizations, processed the data and performed the simulations. ZT and CO analyzed the results. ZT and AC generated the figures. CO and ZT wrote the manuscript with contributions from all co-authors.

**Competing interests:** The contact author has declared that none of the co-authors has any competing interests.

## References

- Balsamo, G., Salgado, R., Dutra, E., Bousseta, S., Stockdale, T., and Potes, M.: On the contribution of lakes in predicting near-surface temperature in a global weather forecasting model, *Tellus A*, 64,15829, <https://doi.org/10.3402/tellusa.v64i0.15829>, 2012.
- Benson, B., J. Magnuson, and S. Sharma.: Global Lake and River Ice Phenology Database, Version 1 [Data Set]. Boulder, Colorado USA. National Snow and Ice Data Center. <https://doi.org/10.7265/N5W66HP8>. 2000.
- Bernus, A., Ottlé, C., & Raoult, N.: Variance-based sensitivity analysis of FLake lake model for global land surface modeling. *Journal of Geophysical Research: Atmospheres*, 126(8), [doi:10.1029/2019JD031928](https://doi.org/10.1029/2019JD031928), 2021.
- Bernus, A. and Ottlé, C.: Modeling subgrid lake energy balance in ORCHIDEE terrestrial scheme using the FLake lake model, *Geosci. Model Dev.*, 15, 4275–4295, doi:10.5194/gmd-15-4275-2022, 2022.
- Cheruy, F., Ducharne, A., Hourdin, F., Musat, I., Vignon, ~~É~~<sup>E</sup>, Gastineau, G., ... & Zhao, Y.: Improved near-surface continental climate in IPSL-CM6A-LR by combined evolutions of atmospheric and land surface physics. *Journal of Advances in Modeling Earth Systems*, 12(10), e2019MS002005, 2020.
- Choulga, M., Kourzeneva, E., Balsamo, G., Bousseta, S., and Wedi, N.: Upgraded global mapping information for earth system modelling: an application to surface water depth at the ECMWF. *Hydrology and Earth System Sciences*, 23(10), 4051–4076, doi:10.5194/hess-23-4051-2019, 2019.

Denfeld, B. A., Baulch, H. M., del Giorgio, P. A., Hampton, S. E., & Karlsson, J.: A synthesis of carbon dioxide and methane dynamics during the ice-covered period of northern lakes. *Limnology and Oceanography Letters*, 3(3), 117-131, 2018.

~~Dutra, E., Stepanenko, V. M., Balsamo, G., Viterbo, P., Miranda, P., Mironov, D., and Schar, C.: An offline study of the impact of lakes on the performance of the ECMWF surface scheme, *Boreal Environ. Res.*, 15, 100–112, 2010.~~

~~Didan, K.: MOD13A1 MODIS/Terra Vegetation Indices 16-Day L3 Global 500m SIN Grid V006. 2015, distributed by NASA EOSDIS Land Processes Distributed Active Archive Center, <https://doi.org/10.5067/MODIS/MOD13A1.006>. Accessed 2024-12-04.~~

Garnaud, C., MacKay, M., & Fortin, V.: A One-Dimensional Lake Model in ECCO's Land Surface Prediction System. *Journal of Advances in Modeling Earth Systems*, 14(2), e2021MS002861, [doi:10.1029/2021MS002861](https://doi.org/10.1029/2021MS002861), 2022.

~~Hersbach, H., Bell, B., Berrisford, P., Hirahara, S., Horányi, A., Muñoz Sabater, J., Nicolas, J., Peubey, C., Radu, R., Schepers, D., Simmons, A., Soci, C., Abdalla, S., Abellan, X., Balsamo, G., Bechtold, P., Biavati, G., Bidlot, J., Bonavita, M., Chiara, G., Dahlgren, P., Dee, D., Diamantakis, M., Dragani, R., Flemming, J., Forbes, R., Fuentes, M., Geer, A., Haimberger, L., Healy, S., Hogan, R. J., Hólm, E., Janisková, M., Keeley, S., Laloyaux, P., Lopez, P., Lupu, C., Radnoti, G., Rosnay, P., Rozum, I., Vamborg, F., Villaume, S., and Thépaut, J.: The ERA5 global reanalysis, *Q. J. Roy. Meteorol. Soc.*, 146, 1999–2049, <https://doi.org/10.1002/qj.3803>, 2020.~~

Huang, L., Wang, X., Yan, Y., Jin, L., Yang, K., Chen, A., ... & Piao, S.: Attribution of lake surface water temperature change in large lakes across China over past four decades. *Journal of Geophysical Research: Atmospheres*, 128(21), e2022JD038465, 2023.

Johnson, M. S., Matthews, E., Du, J., Genovese, V., & Bastviken, D.: Methane emission from global lakes: New spatiotemporal data and observation-driven modeling of methane dynamics indicates lower emissions. *Journal of Geophysical Research: Biogeosciences*, 127, e2022JG006793, <https://doi.org/10.1029/2022JG006793>, 2022.

Lang, J., Lyu, S., Li, Z., Ma, Y., & Su, D. (2018). An investigation of ice surface albedo and its influence on the high-altitude lakes of the Tibetan Plateau. *Remote Sensing*, 10(2), 218. Mammarella, I., et al.: Carbon dioxide and energy fluxes over a small boreal lake in Southern Finland, *J. Geophys. Res. Biogeosci.*, 120, 1296–1314, [doi:10.1002/2014JG002873](https://doi.org/10.1002/2014JG002873), 2015.

Lauerwald, R., Allen, G. H., Deemer, B. R., Liu, S., Maavara, T., Raymond, P., et al.: Inland water greenhouse gas budgets for RECCAP2: 1. State-of-the-art of global scale assessments. *Global Biogeochemical Cycles*, 37, e2022GB007657, <https://doi.org/10.1029/2022GB007657>, 2023.

Le Moigne, P., Colin, J., and Decharme, B.: Impact of lake surface temperatures simulated by the FLake scheme in the CNRM-CM5 climate model, *Tellus A*, 68, 31274, <https://doi.org/10.3402/tellusa.v68.31274>, 2016.

Mammarella, I., Nordbo, A., Rannik, Ü., Haapanala, S., Levula, J., Laakso, H., ... & Vesala, T.: Carbon dioxide and energy fluxes over a small boreal lake in Southern Finland. *Journal of Geophysical Research: Biogeosciences*, 120(7), 1296-1314, 2015.

Messenger, M. L., Lehner, B., Grill, G., Nedeva, I., & Schmitt, O.: Estimating the volume and age of water stored in global lakes using a geo-statistical approach. *Nature communications*, 7(1), 13603, [doi:10.1038/ncomms13603](https://doi.org/10.1038/ncomms13603), 2016.

Mironov, D., Ritter, B., Schulz, J. P., Buchhold, M., Lange, M., & MacHuskaya, E.: Parameterisation of sea and lake ice in numerical weather prediction models of the German Weather Service. *Tellus A: Dynamic Meteorology and Oceanography*, 64(1), 17330, [doi: 10.3402/tellusa.v64i0.17330](https://doi.org/10.3402/tellusa.v64i0.17330), 2012.

~~O'Reilly, C. M., Sharma, S., Gray, D. K., Hampton, S. E., Read, J. S., Rowley, R. J., ... & Zhang, G.: Rapid and highly variable warming of lake surface waters around the globe. *Geophysical Research Letters*, 42(24), 10–773, 2015.~~

Pietikäinen, J.-P., Markkanen, T., Sieck, K., Jacob, D., Korhonen, J., Räisänen, P., Gao, Y., Ahola, J., Korhonen, H., Laaksonen, A., and Kaurola, J.: The regional climate model REMO (v2015) coupled with the 1-D freshwater lake model FLake



(v1): Fenno- Scandinavian climate and lakes, *Geosci. Model Dev.*, 11, 1321– 1342, <https://doi.org/10.5194/gmd-11-1321-2018>, 2018.

Raoult, N., Charbit, S., Dumas, C., Maignan, F., Ottlé, C., & Bastrikov, V.: Improving modelled albedo over the Greenland ice sheet through parameter optimisation and MODIS snow albedo retrievals. *The Cryosphere*, 17(7), 2705-2724, 2023.

Schaaf, C.: ~~MODIS/TERRA+AQUA BRDF/albedo daily L3 global 500m v006: doi:10.5067/MODIS/MCD43A3.006, 2014.~~

~~Schaaf, C. L. B., Liu, J., Gao, F., & Strahler, A. H.: MODIS albedo and reflectance anisotropy products from Aqua and Terra. *Land Remote Sensing and Global Environmental Change: NASA's Earth Observing System and the Science of ASTER and MODIS*, 11, 549–561, 2011.~~

~~Sehaaf, C.,~~ Wang, Z. (2021). *MODIS/Terra+Aqua BRDF/Albedo Daily L3 Global - 500m V061* [Data set]. NASA EOSDIS Land Processes Distributed Active Archive Center. Accessed 2024-12-04 from <https://doi.org/10.5067/MODIS/MCD43A3.061>

Semmler, T., Cheng, B., Yang, Y., and Rontu, L.: Snow and ice on Bear Lake (Alaska) – sensitivity experiments with two lake ice models, *Tellus A*, 64, 17339, <https://doi.org/10.3402/tellusa.v64i0.17339>, 2012.

~~Soci, C., Hersbach, H., Simmons, A., Poli, P., Bell, B., Berrisford, P., ... & Thépaut, J. N. (2024). The ERA5 global reanalysis from 1940 to 2022. *Quarterly Journal of the Royal Meteorological Society*, 150(764), 4014-4048.~~

Svacina, N. A., Duguay, C. R., & Brown, L. C.: Modelled and satellite-derived surface albedo of lake ice—Part I: evaluation of the albedo parameterization scheme of the Canadian Lake Ice Model. *Hydrological Processes*, 28(16), 4550-4561. [doi:10.1002/hyp.10253](https://doi.org/10.1002/hyp.10253), 2014.

~~Sharma, S., Gray, D. K., Read, J. S., O'Reilly, C. M., Schneider, P., Quadrat, A., ... & Woo, K. H.: A global database of lake surface temperatures collected by in situ and satellite methods from 1985–2009. *Scientific data*, 2(1), 1–19, 2015.~~

~~Tranvik, L. J., Downing, J. A., Cotner, J. B., Loiselle, S. A., Striegl, R. G., Ballatore, T. J., ... & Weyhenmeyer: Lakes and reservoirs as regulators of carbon cycling and climate. *Limnology and oceanography*, 54(part2), 2298–2314, 2009.~~

Yang, T. Y., Kessler, J., Mason, L., Chu, P. Y., & Wang, J.: A consistent Great Lakes ice cover digital data set for winters 1973–2019. *Scientific data*, 7(1), 259, 2020.

Wei, Y., Liu, S., Huntzinger, D. N., Michalak, A. M., Viovy, N., Post, W. M., ... & Shi, X.: The North American Carbon Program Multi-scale Synthesis and Terrestrial Model Intercomparison Project—Part 2: Environmental driver data, *Geosci. Model Dev.*, 7, 2875–2893, 2014.

Williamson, C. E., Saros, J. E., Vincent, W. F., & Smol, J. P.: Lakes and reservoirs as sentinels, integrators, and regulators of climate change. *Limnology and oceanography*, 54(6part2), 2273-2282, 2009.

Woolway, R. I., Kraemer, B. M., Lenters, J. D., Merchant, C. J., O'Reilly, C. M., & Sharma, S.: Global lake responses to climate change. *Nature Reviews Earth & Environment*, 1(8), 388-403, 2020.
